# Supplementary material for: High Individual Heterogeneity of Neutralizing Activities against the Original Strain and Nine Different Variants of SARS-CoV-2
Source: MDPI journal article supplement (doi:10.3390/v13112177), 2021-10-28

| Ab Category                                   | Sample ID   | IgG<br>(AU/mL) | Original/B.1.1 | Marseille-4/<br>B.1.160 | Alpha/B.1.1.7 | Marseille-501/<br>A.27 | Beta/B.1.351.2 | Gamma/P.1 | Marseille-<br>484K.V1/R.1 | B.1.214.2   | Delta/B.1.617.2 | Delta/AY.37 |
|-----------------------------------------------|-------------|----------------|----------------|-------------------------|---------------|------------------------|----------------|-----------|---------------------------|-------------|-----------------|-------------|
| mAbs                                          | LY-CoV555   | 35 000 µg/mL   | 0.224 µg/mL    | 0.224 µg/mL             | 1.120 µg/mL   | 3500 µg/mL             |                |           |                           | 1.120 µg/mL | 3500 µg/mL      |             |
| mRNA-<br>based Pfizer/<br>BioNTech<br>vaccine | V-Pfizer-1  | >400           | 1/80           | 1/80                    | 1/80          | 1/80                   | 1/20           | 1/80      | 1/80                      | 1/160       | 1/80            | 1/80        |
|                                               | V-Pfizer-2  | 300            | 1/5            | 1/5                     | 1/10          | 1/10                   |                | 1/5       | 1/10                      | 1/20        | 1/10            | 1/10        |
|                                               | V-Pfizer-3  | >400           | 1/10           | 1/5                     | 1/10          | 1/20                   |                | 1/5       | 1/10                      | 1/80        | 1/10            | 1/10        |
|                                               | V-Pfizer-4  | 192            | 1/5            | 1/5                     | 1/5           | 1/5                    |                |           | 1/5                       | 1/10        |                 |             |
|                                               | V-Pfizer-5  | 152            | 1/40           | 1/10                    | 1/5           | 1/10                   |                | 1/20      | 1/20                      | 1/40        | 1/10            | 1/5         |
|                                               | V-Pfizer-6  | >400           | 1/80           | 1/160                   | 1/80          | 1/40                   | 1/40           | 1/80      | 1/40                      | 1/40        | 1/80            | 1/80        |
|                                               | V-Pfizer-7  | 229            | 1/40           | 1/40                    | 1/20          | 1/20                   | 1/5            | 1/20      | 1/20                      | 1/40        | 1/10            | 1/10        |
|                                               | V-Pfizer-8  | 262            | 1/80           | 1/80                    | 1/80          | 1/80                   | 1/20           | 1/80      | 1/40                      | 1/80        | 1/40            | 1/40        |
|                                               | V-Pizer-9   | 369            | 1/40           | 1/40                    | 1/40          | 1/40                   | 1/20           | 1/160     | 1/160                     | 1/80        | 1/40            | 1/20        |
|                                               | V-Pfizer-10 | 3.5            |                |                         |               |                        |                |           |                           |             |                 |             |
|                                               | V-Pfizer-11 | 363            | 1/80           | 1/40                    | 1/40          | 1/40                   | 1/20           | 1/40      | 1/40                      | 1/40        | 1/40            | 1/20        |
| Adenovirus-<br>based<br>AZD1222               | Astra-1     | 84.7           | 1/5            | 1/5                     |               | 1/5                    |                |           |                           | 1/5         |                 |             |
|                                               | Astra-2     | 277            | 1/20           | 1/10                    | 1/10          | 1/20                   | 1/5            | 1/20      | 1/5                       | 1/40        | 1/10            | 1/5         |

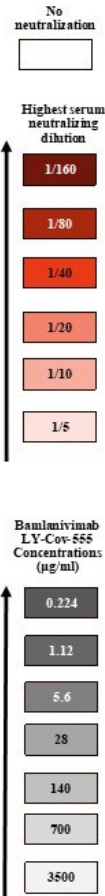

Supplement: s1 [file s1]
