# Supplementary material for: High Individual Heterogeneity of Neutralizing Activities against the Original Strain and Nine Different Variants of SARS-CoV-2
Source: MDPI journal article supplement (doi:10.3390/v13112177), 2021-10-28
Supplement: s1 [file s1]

| Ab Category                               | Sample ID | IgG (AU/mL)  | Original/B.1.1 | Marseille-4/<br>B.1.160 | Alpha/B.1.1.7 | Marseille-501/<br>A.27 | Beta/B.1.351.2 | Gamma/P.1 | Marseille-484K.V1/R.1 | B.1.214.2   | Delta/B.1.617.2 | Delta/AY.37 |
|-------------------------------------------|-----------|--------------|----------------|-------------------------|---------------|------------------------|----------------|-----------|-----------------------|-------------|-----------------|-------------|
| mAbs                                      | LY-CoV555 | 35 000 µg/mL | 0.224 µg/mL    | 0.224 µg/mL             | 1.120 µg/mL   | 3500 µg/mL             |                |           |                       | 1.120 µg/mL | 3500 µg/mL      |             |
| Patients infected with Original virus     | I-1       | NA           | 1/10           | 1/10                    | 1/10          | 1/10                   |                | 1/10      | 1/20                  | 1/40        |                 |             |
|                                           | I-2       | 193          | 1/40           | 1/20                    | 1/20          | 1/80                   |                | 1/10      |                       | 1/40        | 1/20            | NA          |
|                                           | I-3       | 169          | 1/10           | 1/10                    | 1/20          | 1/40                   |                | 1/20      | 1/40                  | 1/40        | NA              | NA          |
|                                           | I-4       | 190          | 1/40           |                         | 1/10          | 1/20                   |                | 1/20      | 1/40                  | 1/40        | 1/40            | NA          |
|                                           | I-5       | 162          | 1/10           | 1/10                    | 1/10          | 1/10                   |                | 1/10      | 1/10                  | 1/20        | NA              | NA          |
|                                           | I-6       | 47           |                | 1/10                    |               |                        |                |           |                       | 1/10        | NA              | NA          |
|                                           | I-7       | 400          | 1/10           | 1/10                    | 1/10          | 1/5                    |                | 1/5       |                       | 1/10        | NA              | NA          |
|                                           | I-8       | >400         | 1/80           | 1/80                    | 1/80          | 1/40                   | 1/80           | 1/160     | 1/80                  | 1/80        | NA              | NA          |
|                                           | I-9       | NA           |                | 1/20                    | 1/10          | 1/20                   | 1/5            | 1/20      | 1/10                  | 1/10        | NA              | NA          |
|                                           | I-10      | >400         | 1/40           | 1/20                    | 1/10          | 1/40                   | 1/20           | 1/20      | 1/40                  | 1/80        | 1/40            | NA          |
|                                           | I-11      | 197          | 1/40           | 1/10                    | 1/10          |                        |                |           |                       | 1/20        |                 | NA          |
| Patients infected with Marseille-4 strain | II-1      | 15.8         |                |                         |               |                        |                |           |                       |             |                 |             |
|                                           | II-2      | 35.5         | 1/5            | 1/5                     |               | 1/5                    |                | 1/5       |                       | 1/5         |                 |             |
|                                           | II-3      | 76.2         | 1/20           | 1/20                    | 1/20          | 1/20                   | 1/5            | 1/5       | 1/5                   | 1/10        | 1/5             | 1/5         |
|                                           | II-4      | 43           | 1/5            | 1/5                     |               |                        |                |           |                       | 1/5         |                 |             |
|                                           | II-5      | 45.7         | 1/10           |                         |               |                        |                |           |                       |             | 1/20            |             |
|                                           | II-6      | 30           |                |                         |               |                        |                |           |                       |             |                 | NA          |
|                                           | II-7      | 32           |                |                         | 1/5           |                        |                |           | 1/5                   | 1/5         |                 |             |
|                                           | II-8      | 161          | 1/40           | 1/20                    | 1/40          | 1/10                   |                | 1/10      | 1/5                   | 1/80        | 1/20            | NA          |
|                                           | II-9      | 25.4         |                |                         |               |                        |                |           |                       |             |                 | NA          |
| Patients infected with Alpha strain       | UK-1      | 15.8         | 1/20           |                         | 1/10          | 1/40                   | 1/20           | 1/40      | 1/10                  | 1/20        | 1/5             | 1/5         |
|                                           | UK-2      | 123          | 1/5            | 1/5                     | 1/10          | 1/10                   |                | 1/10      | 1/5                   | 1/10        | 1/10            | 1/5         |
|                                           | UK-3      | 86           | 1/5            |                         | 1/5           | 1/5                    |                |           |                       | 1/5         |                 |             |
|                                           | UK-4      | 20.3         | 1/5            |                         | 1/10          |                        |                |           |                       |             |                 |             |
|                                           | UK-5      | 221          | 1/20           | 1/40                    | 1/160         | 1/20                   | 1/40           | 1/40      | 1/80                  | 1/80        | 1/20            | 1/20        |
|                                           | UK-6      | 32           | 1/10           | 1/5                     | 1/20          | 1/5                    | 1/5            | 1/5       | 1/5                   | 1/10        | 1/10            |             |
|                                           | UK-7      | 147          | 1/10           | 1/5                     | 1/20          | 1/10                   | 1/5            | 1/5       | 1/5                   | 1/10        | 1/10            | 1/5         |
|                                           | UK-8      | 42           | 1/10           | 1/20                    | 1/20          | 1/5                    |                | 1/5       |                       | 1/5         | 1/5             |             |
|                                           | UK-9      | 31           | 1/10           | 1/20                    | 1/20          | 1/10                   |                |           |                       | 1/5         | 1/10            |             |
|                                           | UK-10     | 10           |                |                         | 1/5           |                        |                |           |                       |             |                 |             |
| Patients infected with the Beta strain    | SA-1      | 13           |                |                         |               |                        |                |           |                       |             |                 | NA          |
|                                           | SA-2      | 10           |                |                         |               |                        |                |           |                       |             |                 |             |
|                                           | SA-3      | 4            |                |                         |               |                        |                |           |                       |             |                 |             |
|                                           | SA-4      | 66.7         |                |                         | 1/20          | 1/10                   | 1/40           | 1/40      | 1/5                   | 1/40        |                 |             |
|                                           | SA-5      | 94           | 1/5            | 1/10                    | 1/20          | 1/10                   | 1/10           | 1/10      | 1/10                  | 1/20        | 1/10            | 1/5         |
|                                           | SA-6      | 15           |                |                         |               |                        | 1/5            | 1/5       |                       |             |                 |             |
|                                           | SA-7      | 34           |                | 1/5                     | 1/5           |                        | 1/5            | 1/5       |                       |             |                 |             |
|                                           | SA-8      | 11.7         |                |                         |               |                        |                |           |                       |             |                 |             |
|                                           | SA-9      | 19.2         |                |                         |               |                        | 1/5            |           |                       |             |                 |             |
|                                           | SA-10     | 26           |                |                         | 1/5           |                        | 1/10           | 1/10      | 1/5                   |             |                 |             |
|                                           | SA-11     | 39           |                |                         |               |                        |                | 1/10      |                       |             |                 |             |
|                                           | SA-12     | 31           |                |                         |               |                        | 1/5            | 1/5       |                       |             |                 |             |

Not available

NA

No neutralization

Highest serum neutralizing dilution

1/160

1/80

1/40

1/20

1/10

1/5

Bamlanivimab LY-Cov-555 Concentrations (µg/ml)

0.224

1.12

5.6

28

140

700

3500
