# Supplementary material for: High Individual Heterogeneity of Neutralizing Activities against the Original Strain and Nine Different Variants of SARS-CoV-2
Source: MDPI journal article supplement (doi:10.3390/v13112177), 2021-10-28
Supplement: s1 [file s1]

| Sera ID | Sex (F/M) | Year of birth | Age (years) | CLIA IgG (AU/mL) | IgG titer interpretation | Date of first positive PCR diagnosis (D/M/Y) | Date of sera collection (D/M/Y) | Time elapsed between 1st SARS-CoV-2-positive PCR test and sera collection |
|---------|-----------|---------------|-------------|------------------|--------------------------|----------------------------------------------|---------------------------------|---------------------------------------------------------------------------|
| I-1     | F         | 1969          | 52          | NA               | NA                       | 3/2/2020                                     | 16/06/2020                      | 4 months                                                                  |
| I-2     | F         | 1971          | 50          | 193              | Positive                 | 23/03/2020                                   | 3/6/2020                        | 3 months                                                                  |
| I-3     | M         | 1960          | 61          | 169              | Positive                 | 26/03/2020                                   | 15/06/2020                      | 3 months                                                                  |
| I-4     | M         | 1980          | 41          | 190              | Positive                 | 17/03/2020                                   | 19/04/2020                      | 1 month                                                                   |
| I-5     | M         | 1982          | 39          | 162              | Positive                 | 18/03/2020                                   | 27/05/2020                      | 2 months                                                                  |
| I-6     | F         | 1986          | 35          | 47               | Positive                 | 16/03/2020                                   | 22/05/2020                      | 2 months                                                                  |
| I-7     | M         | 1943          | 78          | 400              | Positive                 | 29/03/2020                                   | 20/04/2020                      | 3 weeks                                                                   |
| I-8     | M         | 1968          | 53          | >400             | Positive                 | 29/03/2020                                   | 27/04/2020                      | 1 month                                                                   |
| I-9     | F         | 1965          | 56          | NA               | NA                       | 15/04/2020                                   | 7/5/2021                        | 3 weeks                                                                   |
| I-10    | M         | 1964          | 57          | >400             | Positive                 | 19/04/2020                                   | 11/5/2020                       | 3 weeks                                                                   |
| I-11    | M         | 2006          | 15          | 197              | Positive                 | 2/4/2020                                     | 7/5/2020                        | 1 month                                                                   |
| II-1    | F         | 1968          | 53          | 15.8             | Positive                 | 1/3/2021                                     | 1/4/2021                        | 1 month                                                                   |
| II-2    | F         | 1995          | 26          | 35.5             | Positive                 | 19/11/2020                                   | 19/04/2021                      | 5 months                                                                  |
| II-3    | F         | 1993          | 28          | 76.2             | Positive                 | 5/2/2021                                     | 19/04/2021                      | 2 months                                                                  |
| II-4    | F         | 1975          | 46          | 43               | Positive                 | 9/1/2021                                     | 15/04/2021                      | 3 months                                                                  |
| II-5    | M         | 1956          | 65          | 45.7             | Positive                 | 30/12/2020                                   | 12/2/2021                       | 2 months                                                                  |
| II-6    | M         | 1935          | 86          | 30               | Positive                 | 12/2/2021                                    | 8/3/2021                        | 3 weeks                                                                   |
| II-7    | M         | 1981          | 40          | 32               | Positive                 | 2/2/2021                                     | 5/5/2021                        | 3 months                                                                  |
| II-8    | M         | 1952          | 69          | 161              | Positive                 | 7/2/2021                                     | 3/3/2021                        | 1 month                                                                   |
| II-9    | F         | 2004          | 17          | 25.4             | Positive                 | 19/03/2021                                   | 21/04/2021                      | 1 month                                                                   |
| UK-1    | M         | 1986          | 35          | 15.8             | Positive                 | 1/2/2021                                     | 8/4/2021                        | 2 months                                                                  |
| UK-2    | M         | 1962          | 59          | 123              | Positive                 | 19/02/2021                                   | 19/03/2021                      | 1 month                                                                   |
| UK-3    | M         | 1965          | 56          | 86               | Positive                 | 12/2/2021                                    | 17/03/2021                      | 1 month                                                                   |
| UK-4    | F         | 1994          | 27          | 20.3             | Positive                 | 8/3/2021                                     | 15/04/2021                      | 3 weeks                                                                   |
| UK-5    | M         | 1960          | 61          | 221              | Positive                 | 24/03/2021                                   | 19/04/2021                      | 3 weeks                                                                   |
| UK-6    | F         | 1995          | 26          | 32               | Positive                 | 5/2/2021                                     | 23/04/2021                      | 2 months                                                                  |
| UK-7    | M         | 1956          | 65          | 147              | Positive                 | 17/03/2021                                   | 26/04/2021                      | 1 month                                                                   |
| UK-8    | F         | 1993          | 28          | 42               | Positive                 | 1/4/2021                                     | 15/05/2021                      | 1 month                                                                   |
| UK-9    | M         | 1992          | 29          | 31               | Positive                 | 1/2/2021                                     | 18/05/2021                      | 3 months                                                                  |
| UK-10   | F         | 1981          | 40          | 10               | Negative                 | 1/2/2021                                     | 3/5/2021                        | 2 months                                                                  |
| SA-1    | F         | 1994          | 27          | 13               | Borderline               | 12/4/2021                                    | 2/5/2021                        | 3 weeks                                                                   |
| SA-2    | M         | 1985          | 36          | 10               | Negative                 | 21/02/2021                                   | 30/04/2021                      | 2 months                                                                  |
| SA-3    | F         | 1997          | 24          | 4                | Negative                 | 24/03/2021                                   | 20/04/2021                      | 3 weeks                                                                   |
| SA-4    | F         | 1980          | 41          | 66.9             | Positive                 | 21/03/2021                                   | 16/04/2021                      | 3 weeks                                                                   |
| SA-5    | M         | 1968          | 53          | 94               | Positive                 | 15/03/2021                                   | 7/6/2021                        | 3 months                                                                  |
| SA-6    | F         | 1974          | 47          | 15               | Borderline               | 19/03/2021                                   | 7/6/2021                        | 3 months                                                                  |
| SA-7    | M         | 1974          | 47          | 34               | Positive                 | 19/03/2021                                   | 7/6/2021                        | 3 months                                                                  |
| SA-8    | F         | 1992          | 29          | 11.7             | Negative                 | 8/3/2021                                     | 8/6/2021                        | 3 months                                                                  |
| SA-9    | F         | 1963          | 58          | 19.2             | Positive                 | 12/3/2021                                    | 8/6/2021                        | 3 months                                                                  |
| SA-10   | F         | 1978          | 43          | 26               | Positive                 | 22/03/2021                                   | 8/6/2021                        | 3 months                                                                  |
| SA-11   | F         | 1971          | 50          | 39               | Positive                 | 15/03/2021                                   | 8/6/2021                        | 3 months                                                                  |
| SA-12   | F         | 1986          | 35          | 31               | Positive                 | 4/3/2021                                     | 8/6/2021                        | 3 months                                                                  |
