# Supplementary material for: High Individual Heterogeneity of Neutralizing Activities against the Original Strain and Nine Different Variants of SARS-CoV-2
Source: MDPI journal article supplement (doi:10.3390/v13112177), 2021-10-28
Supplement: s1 [file s1]

| Sera ID     | Sex (F/M) | Year of birth | Age (years) | CLIA IgG (AU/mL) | IgG titer interpretation | Vaccine type      | Vaccine Dosage uptake | Date of last vaccine injection (D/M/Y) | Date of sera collection (D/M/Y) | Time between last vaccine injection and sera collection |
|-------------|-----------|---------------|-------------|------------------|--------------------------|-------------------|-----------------------|----------------------------------------|---------------------------------|---------------------------------------------------------|
| V-Pfizer-1  | M         | 1967          | 54          | >400             | Positive                 | Pfizer/BioNTech   | 2 doses               | 1/2/2021                               | 15/02/2021                      | 2 weeks                                                 |
| V-Pfizer-2  | M         | 1961          | 60          | 300              | Positive                 | Pfizer/BioNTech   | 2 doses               | 9/3/2021                               | 19/03/2021                      | 10 days                                                 |
| V-Pfizer-3  | F         | 1969          | 52          | >400             | Positive                 | Pfizer/BioNTech   | 2 doses               | 9/3/2021                               | 19/03/2021                      | 10 days                                                 |
| V-Pfizer-4  | M         | 1952          | 69          | 192              | Positive                 | Pfizer/BioNTech   | 2 doses               | 5/2/2021                               | 22/03/2021                      | 1 month                                                 |
| V-Pfizer-5  | F         | 1969          | 52          | 152              | Positive                 | Pfizer/BioNTech   | 2 doses               | 27/01/2021                             | 8/4/2021                        | 3 months                                                |
| V-Pfizer-6  | F         | 1994          | 27          | >400             | Positive                 | Pfizer/BioNTech   | 2 doses               | 8/4/2021                               | 22/04/2021                      | 14 days                                                 |
| V-Pfizer-7  | M         | 1992          | 29          | 229              | Positive                 | Pfizer/BioNTech   | 2 doses               | 17/02/2021                             | 19/04/2021                      | 2 months                                                |
| V-Pfizer-8  | F         | 1993          | 28          | 262              | Positive                 | Pfizer/BioNTech   | 2 doses               | 6/2/2021                               | 22/04/2021                      | 2 months                                                |
| V-Pfizer-9  | M         | 1992          | 29          | 369              | Positive                 | Pfizer/BioNTech   | 2 doses               | 10/2/2021                              | 19/04/2021                      | 2 months                                                |
| V-Pfizer-10 | M         | 1939          | 82          | 3.5              | Negative                 | Pfizer/BioNTech   | 2 doses               | 1/3/2021                               | 1/4/2021                        | 1 month                                                 |
| V-Pfizer-11 | M         | 1992          | 29          | 363              | Positive                 | Pfizer/BioNTech   | 2 doses               | 22/02/2021                             | 19/04/2021                      | 2 months                                                |
| Astra-1     | F         | 1963          | 58          | 84.7             | Positive                 | Vaxzevria AZD1222 | 2 doses               | 3/4/2021                               | 3/5/2021                        | 1 month                                                 |
| Astra-2     | M         | 1963          | 58          | 277              | Positive                 | Vaxzevria AZD1222 | 2 doses               | 12/5/2021                              | 31/05/2021                      | 2 weeks                                                 |
